# Supplementary material
Source: PubMed Central journal article supplement (PMC6469502)
Supplement: NIHMS1017352-supplement-1.pdf [file NIHMS1017352-supplement-1.pdf]

## Supporting Material

### Specific and Selective Inhibitors of Proprotein Convertases Engineered by Transferring Serpin B8 Reactive-Site and Exosite Determinants of Reactivity to the Serpin $\alpha$ 1PDX

Gonzalo Izaguirre<sup>1\*</sup>, Marcelino Arciniega<sup>2</sup> and Andrea G. Quezada<sup>2</sup>

From the <sup>1</sup>Department of Periodontics, College of Dentistry, University of Illinois at Chicago, Chicago, Illinois, 60612, USA <sup>2</sup>Department of Biochemistry and Structural Biology, Institute of Cellular Physiology, National Autonomous University of Mexico, Mexico City, 04510, Mexico

\*To whom correspondence should be addressed: Gonzalo Izaguirre: Department of Periodontics, College of Dentistry, University of Illinois at Chicago, Chicago, IL 60612; [goniza@uic.edu](mailto:goniza@uic.edu); Tel. (312) 355-0573.

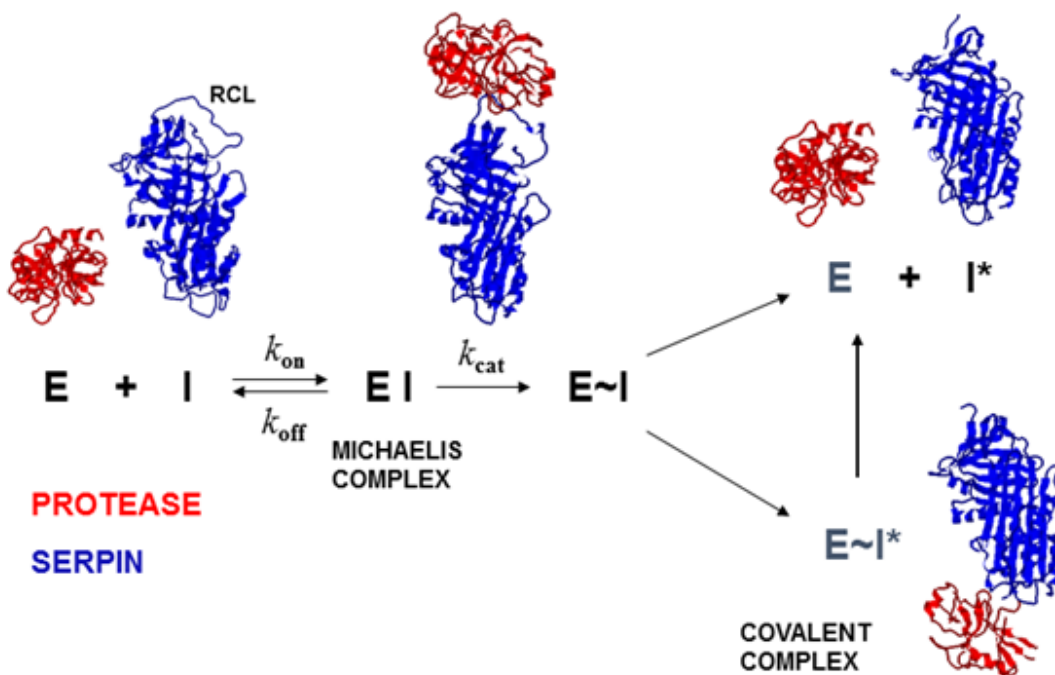

**Figure S1.** Mechanism of protease inhibition by serpins. The catalytic site of the protease (E) binds to the serpin (I) reactive center loop (RCL) to form an equilibrium binding Michaelis complex (EI). The Michaelis complex then undergoes the chemical reaction step ( $k_{cat}$ ), in which a covalent-acyl bond (E~I) is formed. The covalent complex can be rapidly resolved either by the hydrolysis of the bond, which leads to the formation of cleaved serpin (I\*) and the regeneration of the free protease (E), or by a conformational transition step that traps the protease in a stable inhibitory covalent complex with the inhibitor (E~I\*). The inhibitory complex slowly dissociates into cleaved serpin and free enzyme. A 1:1 stoichiometry of inhibition is indicative of an efficient mechanism of inhibition.

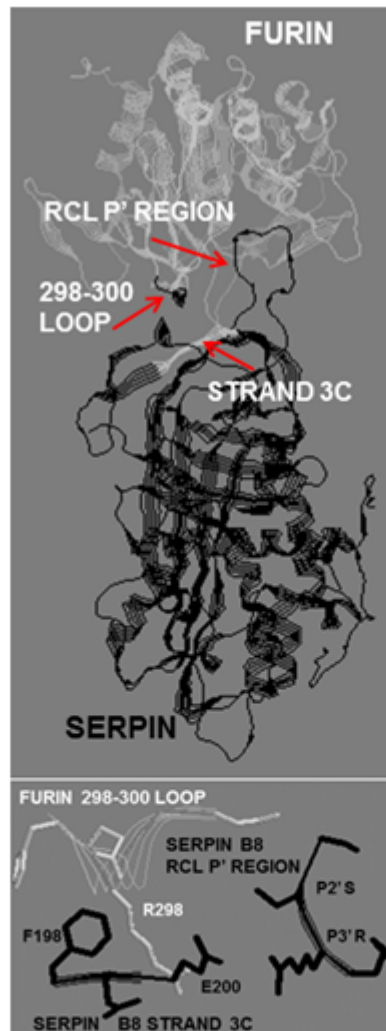

**Figure S2.** Model of the Michaelis complex structure formed by furin and serpin B8. The relative positions of the serpin RCL and strand 3 of  $\beta$ -sheet C, and the protease 298-300 loop are shown. The serpin exosite residues are located on strand 3C. The modulation of the interaction between the serpin RCL P' region and the PC 298-300 loop (Arg298 forms part of the S2' pocket) by the serpin strand 3C exosite residues (F198 and E200 in serpin B8; Y222 and E224 in  $\alpha$ 1PDX) was described in reference 10. Here, the RCL primed regions of serpin B8 and  $\alpha$ 1PDX are reported to determine different selective exosite interactions between furin and PC4-PC7.
